# Supplementary material for: Contrasting Expression Patterns of Histone mRNA and microRNA 760 in Patients with Gastric Cancer
Source: Oxford University Press journal article supplement (doi:10.1158/1078-0432.ccr-12-3186), 2013-10-04
Supplement: 10780432ccr123186-sup-table_s2.xlsx [file 10780432ccr123186-sup-table_s2.xlsx]

## Sheet: Table S3
	Supplementary Table S2A. HIST1H3D expression and clinicopathological factors
		Low expression			High expression
		(n = 77)			(n = 38)
	Factors	number	(%)		number	(%)	p value
	Age
	≥ 65	49	63.6364		23	60.5263	0.7462
	< 65	28	36.3636		15	39.4737
	Sex
	Male	49	63.6364		25	65.7895	0.8203
	Female	28	36.3636		13	34.2105
	Size
	(Large) ≥ 50mm	40	51.9481		21	55.2632	0.7374
	(Small) < 50mm	37	48.0519		17	44.7368
	Histologya
	well ＆moderately	40	51.9481		18	47.3684	0.945
	poorly ＆others	37	48.0519		20	52.6316
	Tumor stage
	T1	25	32.4675		4	10.5263	0.0071**
	T2-T4	52	67.5325		34	89.4737
	Lymph node metastasis
	Absent	33	42.8571		7	18.4211	0.0076**
	Present	44	57.1429		31	81.5789
	Lymphatic invasion
	Absent	25	32.4675		6	15.7895	0.0504
	Present	52	67.5325		32	84.2105
	Venous invasion
	Absent	59	76.6234		26	68.4211	0.3507
	Present	18	23.3766		12	31.5789
	Liver metastasis
	Absent	73	94.8052		36	94.7368	0.9876
	Present	4	5.19481		2	5.26316
	Peritoneal dissemination
	Absent	69	89.6104		28	73.6842	0.0316*
	Present	8	10.3896		10	26.3158
	Stage
	I	33	42.8571		5	13.1579	0.0041**
	II	16	20.7792		7	18.4211
	III	14	18.1818		13	34.2105
	IV	14	18.1818		13	34.2105
	awell, modrately and poorly: differentiated types of gastric adnicarcinoma
	* p < 0.05, ** p < 0.01
	Supplemetary Table S2B. Results of univariate and multivariate analysis of clinicopayhological factor for 5-year overall survival (Cox proportional hazard model)
	Factors				Univariate analysis			Multivaliate analysis
					RR	95% CI	p value	RR	95% CI	p value
	Sex (female/male)				1.247	0.87-1.88	0.244	-	-	-
	Histological differentation (wella, moderatelyb/othersc)				1.222	0.87-1.75	0.255	-	-	-
	Tumor Stage (T1/T2-T4)				2.741	1.51-6.81	0.0002***	0.874	0.43-2.34	0.7536
	Lymph node metastasis (negative/positive)				5.366	2.49-22.64	< 0.0001*	5.006	2.06-22.17	< 0.0001***
	Venous invasion (negative/positive)				1.883	1.32-2.68	0.0006***	1.008	0.64-1.56	0.9714
	Liver metastasis (negative/positive)				2.676	0.62-6.44	0.1473	-	-	-
	Peritoneal dissemination (negative/positive)				3.106	2.10-4.57	< 0.0001***	2.574	1.60-4.22	< 0.0001***
	HIST1H3DmRNA expression (low/high)				1.564	1.11-2.21	0.0113*	1.166	0.82-1.66	0.3863
	RR; Relative risk, CI; Confidence interval, *P < 0.05, **P < 0.01, ***P < 0.001
	awell: well differentiated type, bmoderately: moderately differntiated type, cOthers: poorly differentiated and schirous type.
	*P < 0.05, **P < 0.01, ***P < 0.001
