# Supplementary material for: Contrasting Expression Patterns of Histone mRNA and microRNA 760 in Patients with Gastric Cancer
Source: Oxford University Press journal article supplement (doi:10.1158/1078-0432.ccr-12-3186), 2013-10-04
Supplement: 10780432ccr123186-sup-table_s5.xlsx [file 10780432ccr123186-sup-table_s5.xlsx]

## Sheet: Table S5
Supplementary Table S5. Comparison of Histone mRNA metabolism-associated genes expression in BM samples from GC patients
	GeneID	Descriptions	Average RPKMa			Fold change	p value
			Stage I		Stage IV	Stage IV/I
Transcription and cleavage of histone mRNA	SLBP	stem-loop (histone) binding protein,	8.58		17.4125	2.02943	NSb
	ZFP100	zinc finger protein 473,zinc finger protein 473,	0.835		1.5625	1.87126	p < 0.05
	CPSF73	cleavage and polyadenylation specific factor 3,,	10.3775		17.41	1.67767	p < 0.1
	CPSF100	cleavage and polyadenylation specific factor 2,	2.9125		4.28	1.46953	NS
	LMS11	LSM11, U7 small nuclear RNA associated,	0.3325		0.815	2.45113	p < 0.05
	LMS10	LSM10, U7 small nuclear RNA associated,	32.26		41.475	1.28565	NS
	SYMPK	symplekin,	17.285		17.01	0.98409	NS
Circularization and translation of histone mRNA	EIF4G	eukaryotic translation initiation factor 4	14.64		53.5575	3.6583	NS
	SLIP	MIF4G domain containing,	20.56		20.87	1.01508	NS
Histone mRNA degradation	LSM1	Lsm1 protein,	8.3175		16.83	2.02344	NS
	XRN1	5'-3' exoribonuclease 1 isoform a, isoform b,	1.615		3.7025	2.29257	p < 0.05
	TUTase	terminal uridylyl transferase 1, U6,	4.43		6.005	1.35553	NS
	UPF1	regulator of nonsense transcripts 1,	6.82		13.875	2.03446	NS
	DCP1	decapping enzyme Dcp1b,	2.905		5.2825	1.81842	p < 0.1
	DCP2	DCP2 decapping enzyme,	3.635		5.5475	1.52613	p < 0.05
SLBP degradation	CyclinA	cyclin A1 isoform a,	0.315		0.5925	1.88095	p < 0.05
	CDK1	cell division cycle 2 protein isoform 1, isoform 2,	5.2575		14.9375	2.84118	NS
aRPKM: read per kilobase per million mapped reads.
b NS: not significant
